# Supplementary material
Source: HighWire-hosted journal article supplement (https://jnm.snmjournals.org/highwire/filestream/94334/field_highwire_adjunct_files/0/100271_Supplemental_Data.pdf)
Supplement: 100271_Supplemental_Data.pdf [file 100271_Supplemental_Data.pdf]

**Supplemental Table 1. Results single SNP and four-polymorphism haplotype analyses**

| Single SNP analysis                                       |               |       |         |
|-----------------------------------------------------------|---------------|-------|---------|
| SNP                                                       |               | B*    | p-value |
| rs420422                                                  |               | -0.29 | 0.533   |
| rs462523                                                  |               | -0.30 | 0.533   |
| rs458609                                                  |               | 0.21  | 0.708   |
| rs457702                                                  |               | 0.21  | 0.708   |
| Haplotype analysis rs2937639 - rs462523 - rs458609 - VNTR |               |       |         |
| Haplotype                                                 | Frequency (%) | B*    | p-value |
| G-C-G-10R                                                 | 25.0          | -0.60 | 0.618   |
| A-C-G-10R                                                 | 17.9          | -0.12 | 0.926   |
| G-T-G-10R                                                 | 14.2          | -1.14 | 0.368   |
| A-T-G-10R                                                 | 4.5           | -2.79 | 0.089   |
| G-T-A-10R                                                 | 5.4           | -0.95 | 0.543   |
| A-T-A-10R                                                 | 6.6           | -1.66 | 0.243   |
| G-C-G-9R                                                  | 14.0          | -0.44 | 0.719   |
| G-T-G-9R                                                  | 1.7           | -1.96 | 0.340   |
| A-T-G-9R                                                  | 5.2           | 1.37  | 0.340   |
| G-T-A-9R                                                  | 1.5           | -1.12 | 0.601   |
| A-T-A-9R                                                  | 4.0           | 2.25  | 0.165   |
| Covariates                                                |               |       |         |
| Age                                                       |               | 0.07  | 0.484   |
| Gender                                                    |               | 1.37  | 0.040   |

N = 74. All analyses are corrected for age and gender. \* Average effect B.
